# Supplementary material for: Correlates of Alcohol Consumption Among a Socially-Disadvantaged Population in Poland
Source: MDPI journal article supplement (doi:10.3390/ijerph17239074), 2020-12-04
Supplement: s1 [file s1]

## Correlates of alcohol consumption among a socially-disadvantaged population in Poland

Kinga Polanska\* and Dorota Kaleta

### Supplementary Materials

**Table S1.** Odds ratio (OR) and 95% confidence interval (CI) for not following recommendations for alcohol consumption by socio-demographic and lifestyle-related characteristics of the population – analysis stratify by gender.

| Variables                                         | Men              |          |                  |          | Women            |          |                 |          |
|---------------------------------------------------|------------------|----------|------------------|----------|------------------|----------|-----------------|----------|
|                                                   | Unadjusted Model |          | Adjusted Model   |          | Unadjusted Model |          | Adjusted Model* |          |
|                                                   | OR (95% CI)      | <i>p</i> | OR (95% CI)      | <i>p</i> | OR (95% CI)      | <i>p</i> | OR (95% CI)     | <i>p</i> |
| <b>Age (years)</b>                                |                  |          |                  |          |                  |          |                 |          |
| < 30                                              | 1                |          |                  |          | 1                |          |                 |          |
| 30–39                                             | 1.10 (0.54–2.24) | 0.80     |                  |          | 0.84 (0.56–1.25) | 0.39     |                 |          |
| 40–49                                             | 0.95 (0.47–1.92) | 0.89     |                  |          | 0.82 (0.54–1.25) | 0.35     |                 |          |
| 50–59                                             | 0.96 (0.45–2.05) | 0.91     |                  |          | 1.03 (0.60–1.77) | 0.93     |                 |          |
| <b>Education</b>                                  |                  |          |                  |          |                  |          |                 |          |
| Primary                                           | 0.96 (0.59–1.56) | 0.88     |                  |          | 1.09 (0.79–1.52) | 0.60     |                 |          |
| Vocational                                        | 0.73 (0.46–1.16) | 0.18     |                  |          | 1.15 (0.85–1.56) | 0.35     |                 |          |
| Secondary or higher                               | 1                |          |                  |          | 1                |          |                 |          |
| <b>Employment status</b>                          |                  |          |                  |          |                  |          |                 |          |
| Permanent or temporary job                        | 1.32 (0.91–1.91) | 0.14     |                  |          | 1.10 (0.84–1.45) | 0.49     |                 |          |
| Disabled or retired                               | 0.60 (0.27–1.33) | 0.21     |                  |          | 1.28 (0.56–2.92) | 0.55     |                 |          |
| Unemployed                                        | 1                |          |                  |          | 1                |          |                 |          |
| <b>Subjective assessment of monthly income</b>    |                  |          |                  |          |                  |          |                 |          |
| Sufficient to cover all living needs              | 1                |          |                  |          | 1                |          |                 |          |
| Sufficient to cover basic needs only              | 0.83 (0.44–1.55) | 0.57     |                  |          | 0.89 (0.60–1.32) | 0.57     |                 |          |
| Not sufficient to cover even the basic needs      | 1.01 (0.53–1.95) | 0.96     |                  |          | 1.21 (0.78–1.88) | 0.40     |                 |          |
| Difficult to say                                  | 0.63 (0.28–1.41) | 0.26     |                  |          | 0.74 (0.42–1.28) | 0.28     |                 |          |
| <b>Subjective assessment of living conditions</b> |                  |          |                  |          |                  |          |                 |          |
| Fair or rather fair                               | 1                |          | 1                |          | 1                |          |                 |          |
| Neither fair nor poor or difficult to say         | 1.40 (0.97–2.04) | 0.07     | 1.39 (0.96–2.01) | 0.08     | 1.07 (0.82–1.40) | 0.60     |                 |          |
| Rather poor or very poor                          | 1.85 (0.86–3.98) | 0.12     | 1.77 (0.82–3.83) | 0.15     | 1.25 (0.72–2.16) | 0.43     |                 |          |
| <b>Cohabitation with partner and/or family</b>    |                  |          |                  |          |                  |          |                 |          |
| Yes                                               | 1                |          |                  |          | 1                |          |                 |          |

|                                                   |                  |      |                  |      |                  |      |
|---------------------------------------------------|------------------|------|------------------|------|------------------|------|
| No                                                | 1.45 (0.86–2.46) | 0.16 |                  |      | 1.30 (0.92–1.84) | 0.13 |
| <b>Children &lt; 15 years</b>                     |                  |      |                  |      |                  |      |
| Yes                                               | 1                |      | 1                |      | 1                |      |
| No                                                | 1.50 (1.01–2.22) | 0.04 | 1.46 (0.99–2.17) | 0.06 | 0.17 (0.89–1.54) | 0.26 |
| <b>Subjective assessment of life satisfaction</b> |                  |      |                  |      |                  |      |
| Extremely satisfied/Satisfied                     | 1                |      |                  |      | 1                |      |
| Neutral                                           | 1.35 (0.92–1.98) | 0.13 |                  |      | 1.12 (0.85–1.47) | 0.42 |
| Slightly dissatisfied                             | 1.12 (0.54–2.31) | 0.77 |                  |      | 1.36 (0.78–2.38) | 0.27 |
| Dissatisfied/Extremely dissatisfied               | 0.97 (0.40–2.32) | 0.94 |                  |      | 1.76 (0.73–4.22) | 0.21 |
| <b>Subjective health state</b>                    |                  |      |                  |      |                  |      |
| Fair/rather fair                                  | 1                |      |                  |      | 1                |      |
| Neither fair nor poor                             | 0.73 (0.48–1.11) | 0.14 |                  |      | 0.90 (0.66–1.24) | 0.52 |
| Rather poor/poor                                  | 0.79 (0.47–1.32) | 0.37 |                  |      | 1.11 (0.71–1.76) | 0.65 |
| <b>Number of health problems</b>                  |                  |      |                  |      |                  |      |
| 0                                                 | 0.99 (0.41–2.38) | 0.97 |                  |      | 0.73 (0.38–1.38) | 0.33 |
| 1–3                                               | 1.29 (0.57–2.93) | 0.54 |                  |      | 0.83 (0.49–1.42) | 0.50 |
| 4–6                                               | 1.15 (0.48–2.75) | 0.76 |                  |      | 0.81 (0.46–1.42) | 0.47 |
| >7                                                | 1                |      |                  |      | 1                |      |
| <b>Combined HLI</b>                               |                  |      |                  |      |                  |      |
| 0–2                                               | 0.60 (0.31–1.16) | 0.13 |                  |      | 1.33 (0.95–1.87) | 0.09 |
| 3–4                                               | 1                |      |                  |      | 1                |      |

HLI—Healthy Lifestyle Index (as the sum of points given for each of the four lifestyle-related factors (smoking, BMI, diet, recreational physical activity); participants received 1 if they followed the relevant recommendations and 0 if the recommendations were not followed). \* Multivariable model was not performed as only for combined HLI the requirements for inclusion into multivariable analysis ( $p < 0.1$ ) was achieved.
